# Supplementary material for: Deposition of Ag and Ag–Au nanocrystalline films with tunable conductivity at the water–toluene interface
Source: Royal Society of Chemistry journal article supplement (doi:10.1039/c7ra13370g), 2018-01-01
Supplement: c7ra13370g1.pdf [file c7ra13370g1.pdf]

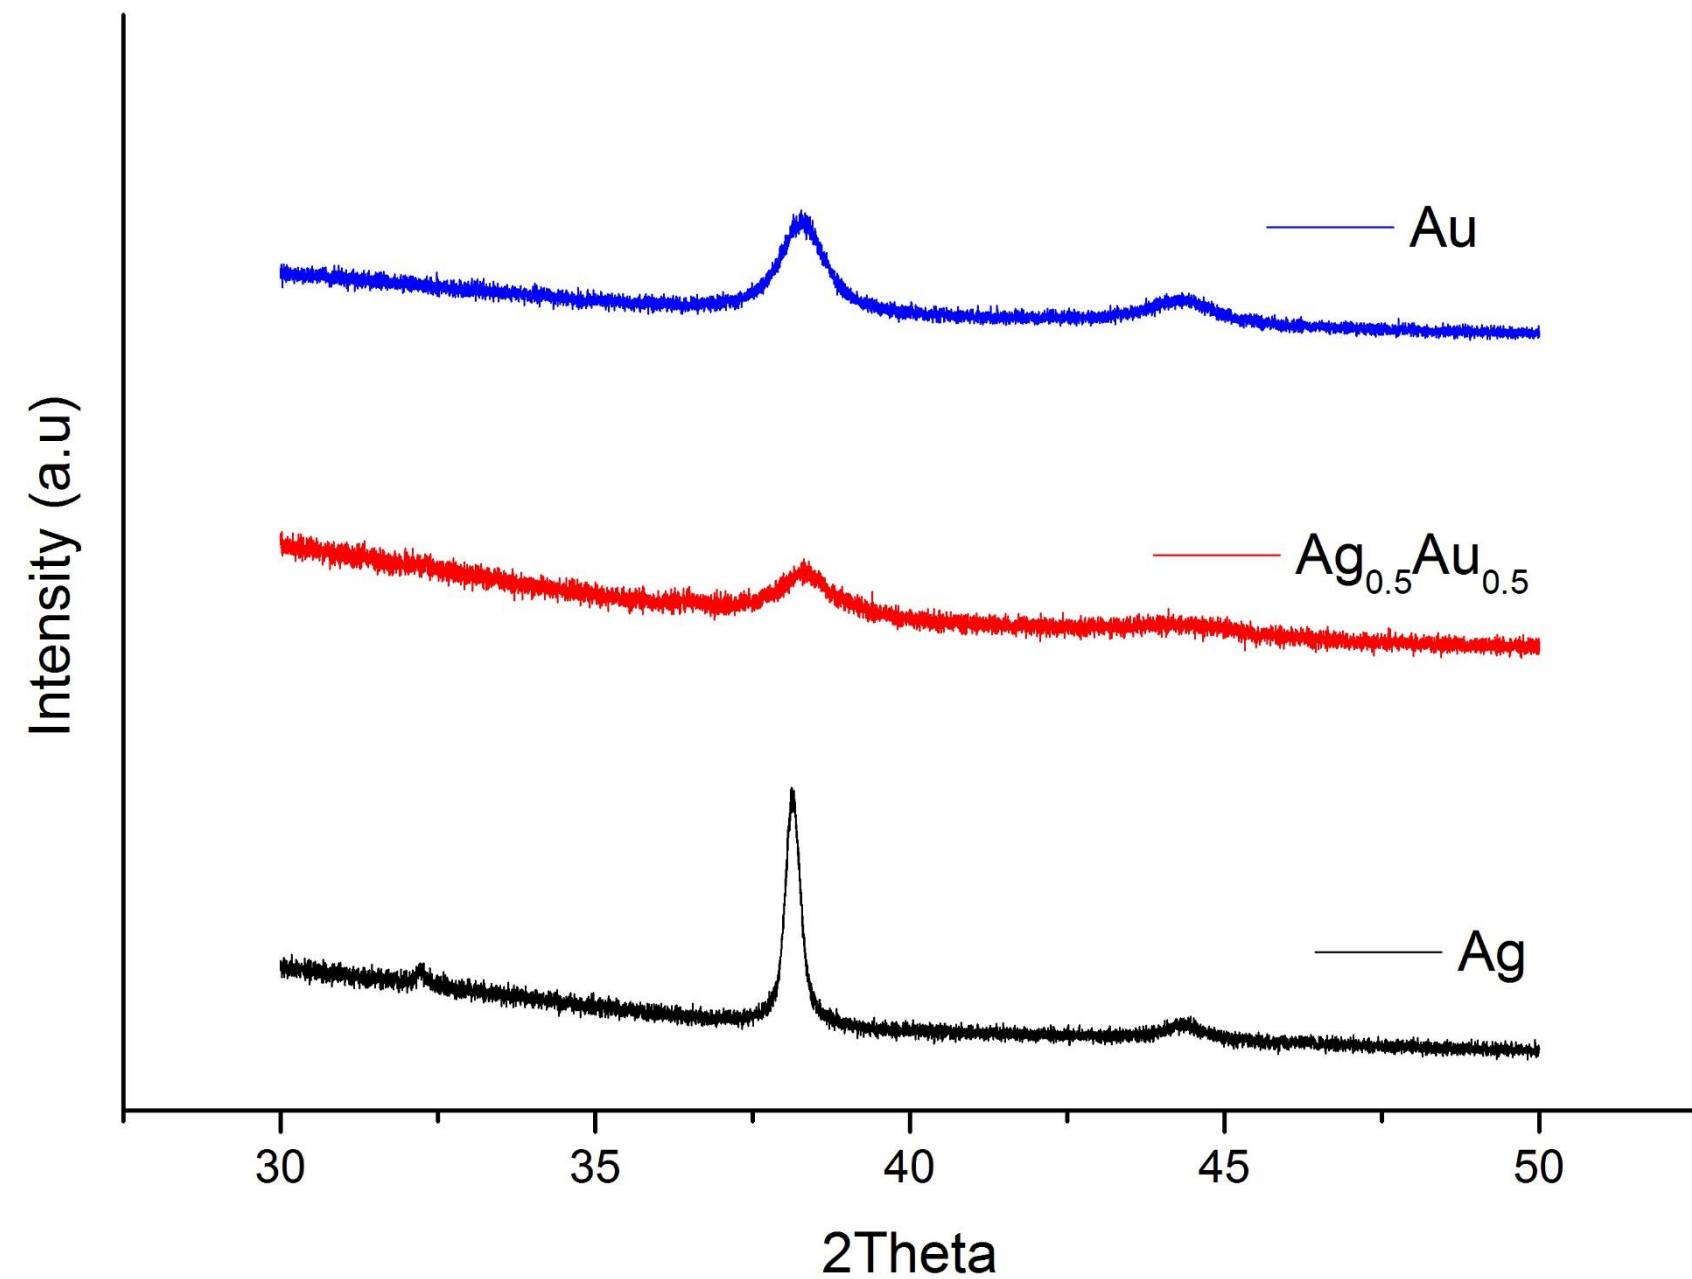

Figure S1: Powder X-ray diffraction from different interfacial films of nanocrystals. The composition is indicated in the figure.

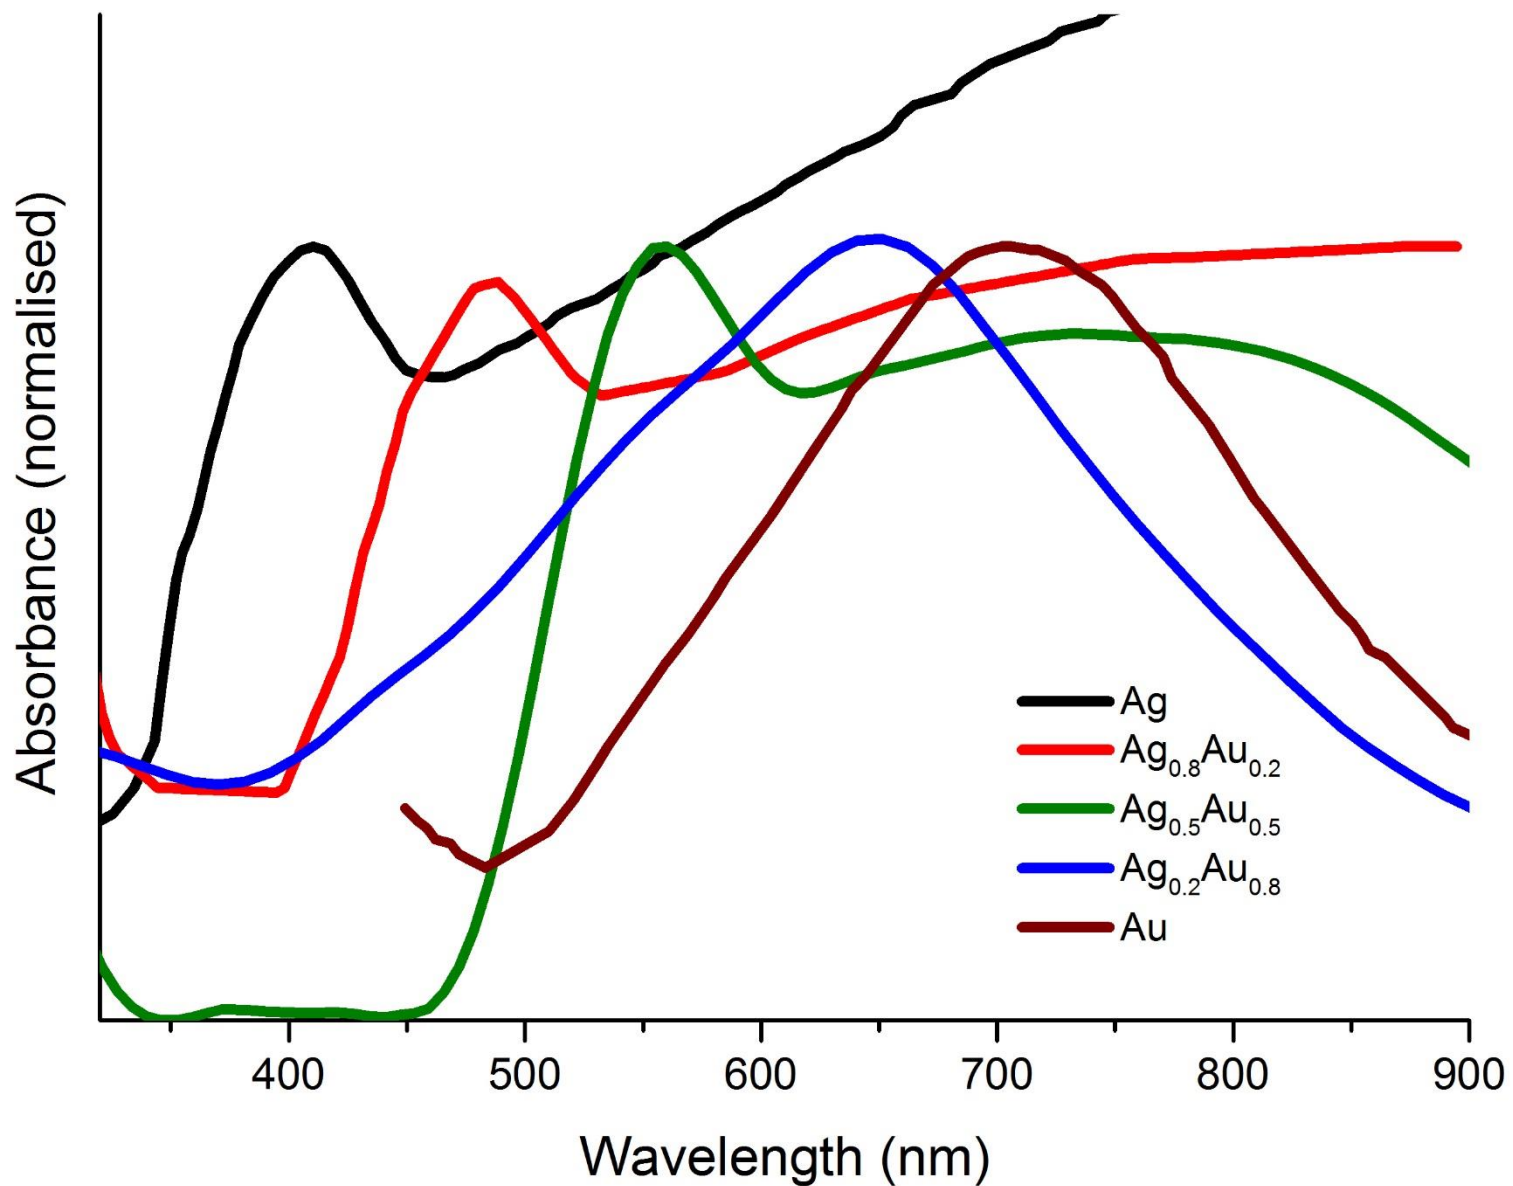

Figure S2: Absorption spectra from different interfacial films of nanocrystals. The composition is indicated.

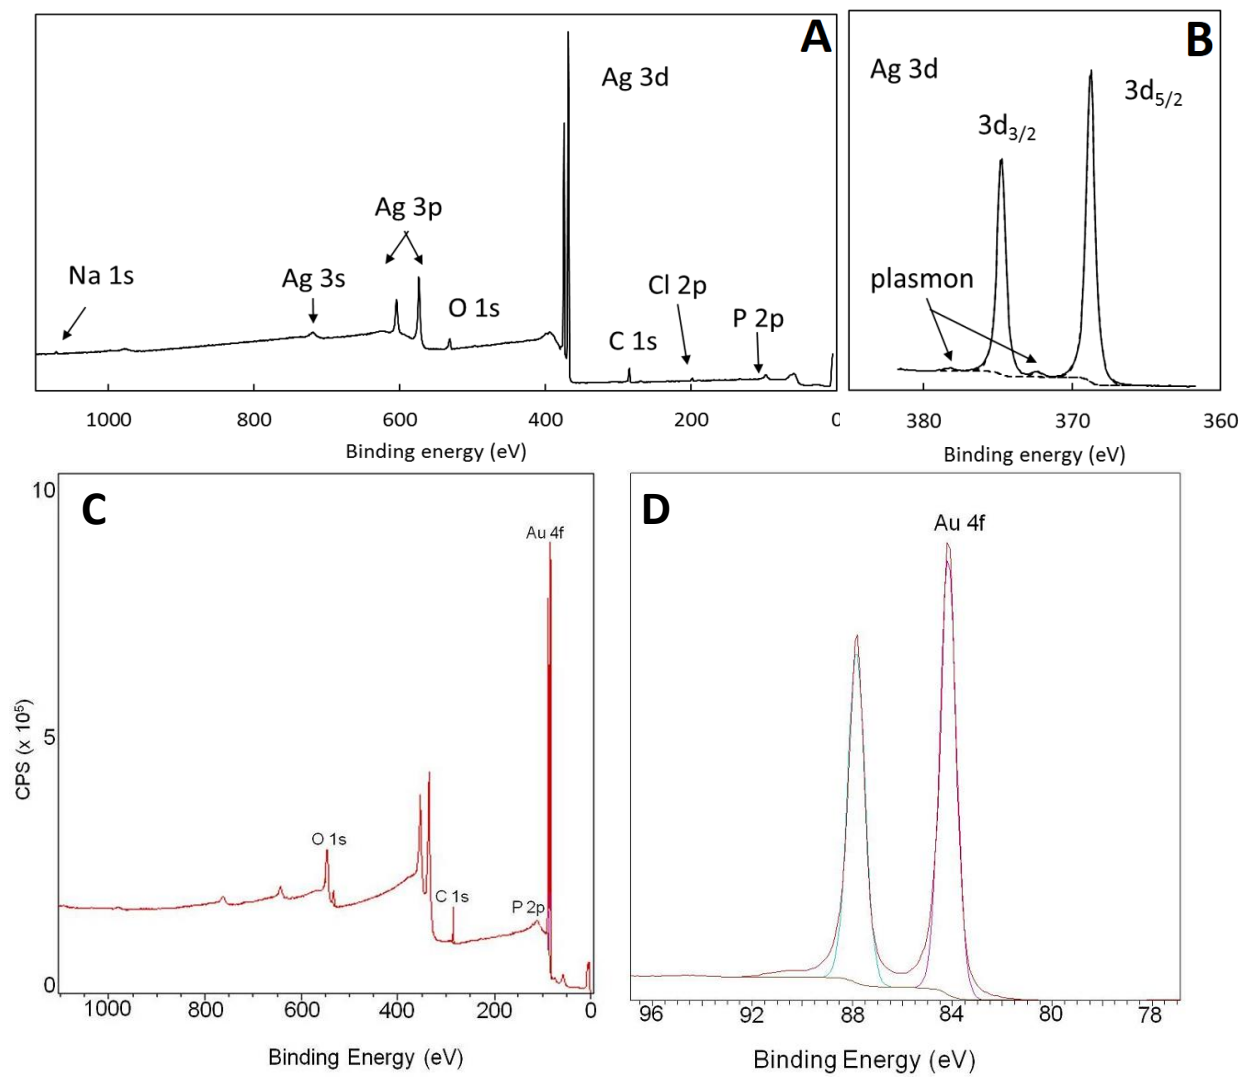

Figure S3: X-ray photoelectron spectra obtained from the films of nanocrystals (A) survey scan from film of Ag nanocrystals; (B) high resolution scan over the Ag 3d region; (C) survey scan from film of Au nanocrystals; (D) high resolution scan over the Au 4f region.
